# Supplementary material
Source: PubMed Central journal article supplement (PMC2879774)
Supplement: pp.110.155457_1.pdf [file pp.110.155457_1.pdf]

## SUPPLEMENTAL DATA

**Table S1.** Effect of *S/PRALF* on media pH

| +/- <i>S/PRALF</i>  | HEPES pH 6 Buffered PGM |               | Un-buffered PGM |               |
|---------------------|-------------------------|---------------|-----------------|---------------|
|                     | +                       | -             | +               | -             |
| Pre-pollen addition | 6.03 ± (0.01)           | 6.03          | 6.17 ± (0.14)   | 6.07 ± (0.07) |
| 0 min               | 5.98 ± (0.01)           | 6.05 ± (0.01) | 6.08 ± (0.06)   | 6.06 ± (0.05) |
| 15 min              | 6.02                    | 5.97          | 6.13 ± (0.06)   | 6.06 ± (0.04) |
| 30 min              | 6.04                    | 5.96          | 6.04 ± (0.05)   | 6.02 ± (0.03) |
| 45 min              | 6.02                    | 5.93 ± (0.01) | 6.11 ± (0.01)   | 6.01 ± (0.01) |
| 60 min              | 6.00 ± (0.03)           | 5.93 ± (0.01) | 6.01 ± (0.05)   | 5.99 ± (0.04) |

Pollen was added to pollen germination media (PGM) containing 0.1 μM *S/PRALF* peptide and the pH was tracked every 15 min for 1 h from three flowers ± SEM. n = 3.

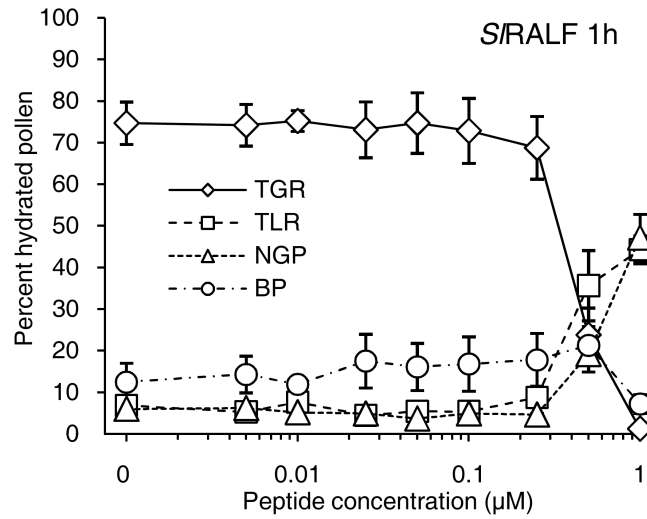

**Figure S1.** Vegetative *S/RALF* has a reduced effect on pollen. Pollen was exposed to exogenous *S/RALF* peptide at concentrations from 0.005 to 1 μM for 1 h, and classified according to morphology using methods identical to those used to generate Fig. 6. The average percent of hydrated pollen in each classification group (pollen with tubes greater than the radius (TGR), pollen with tubes less than the radius (TLR), non-germinated pollen (NGP), and burst pollen (BP)) ± SEM is shown at each concentration of *S/RALF* peptide.  $n \geq 100$  for each treatment.

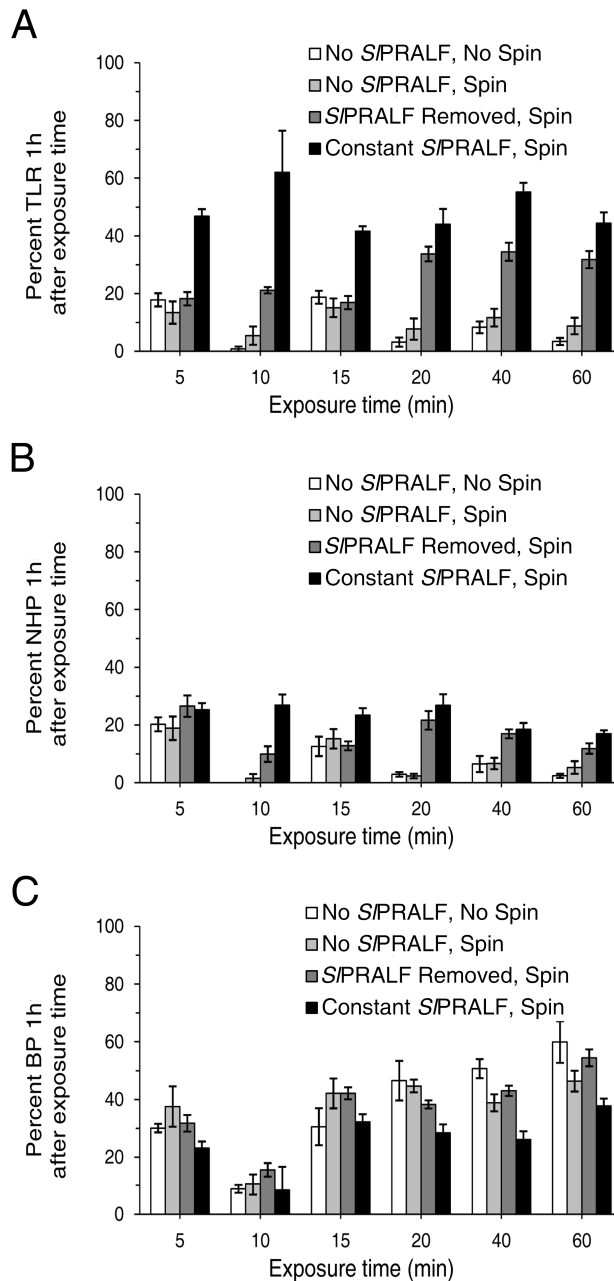

**Figure S2.** *S/PRALF* inhibition reversibility for abnormal pollen morphology classes.

Histograms show percent hydrated pollen in each class  $\pm$  SEM 1 h after time-limited treatment with  $0.1 \mu\text{M}$  *S/PRALF* A, pollen with tubes less than the radius of the grain (TLR). B, Non-germinated pollen (NGP). C, Burst pollen (BP). Pollen was treated with peptide for designated exposure times, pelleted by centrifugation and resuspended in medium containing  $0.1 \mu\text{M}$  *S/PRALF* (Constant *S/PRALF*, Spin = black bars) or no peptide (*S/PRALF* Removed, spin = dark gray bars). Samples not treated with peptide were analyzed without centrifugation (No *S/PRALF*, No Spin = white bars) or with centrifugation (No *S/PRALF*, Spin = light gray bars).  $n \geq 100$  for each treatment.
